# Supplementary material for: DHP-Derivative and Low Oxygen Tension Effectively Induces Human Adipose Stromal Cell Reprogramming
Source: PubMed Central journal article supplement (PMC2817727; doi:10.1371/journal.pone.0009026), 2010-02-09

# Chromosome 1~4

hATSC\_con

De-ATSC\_

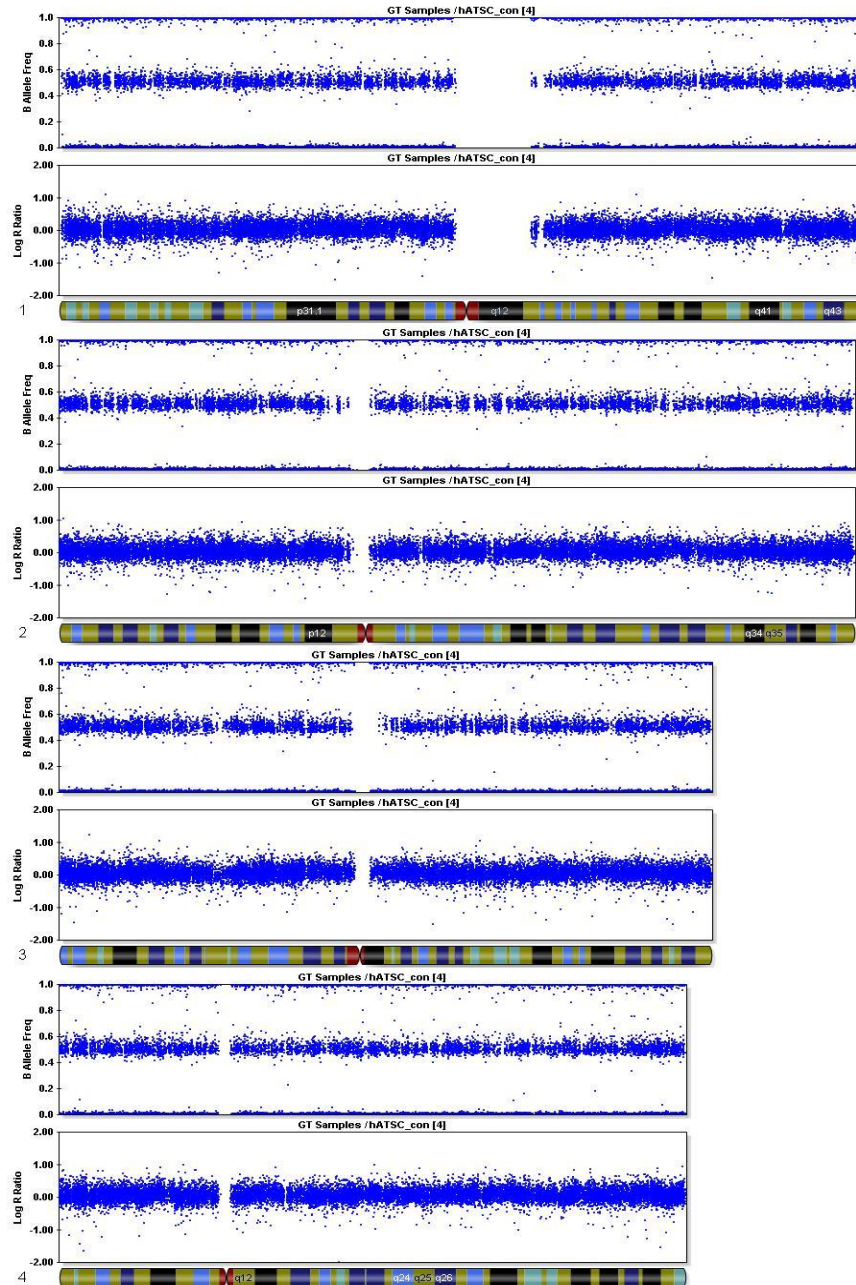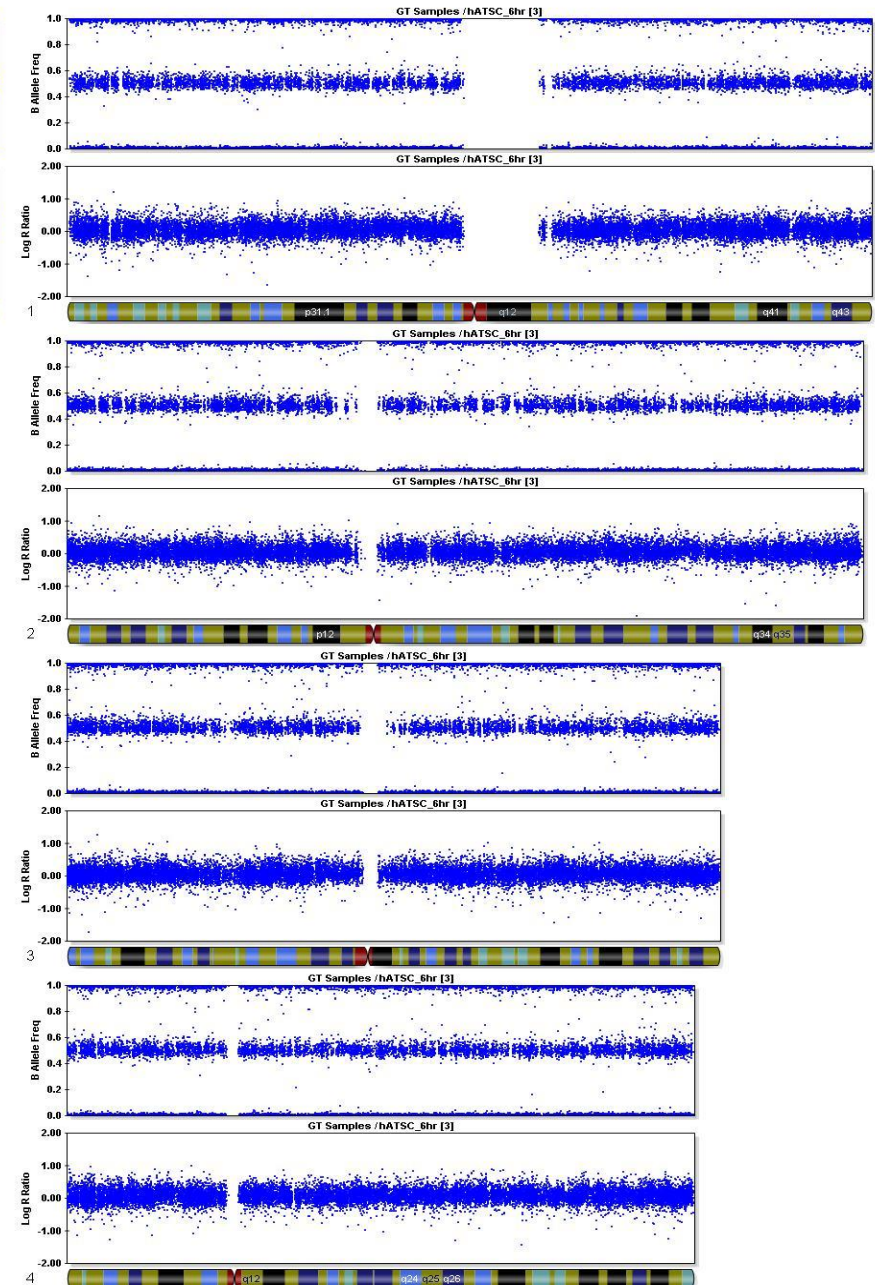

# Chromosome 5~8

## hATSC\_con

## De-hATSC\_

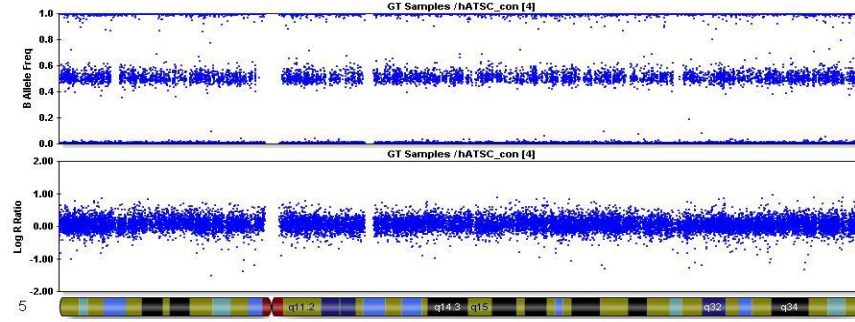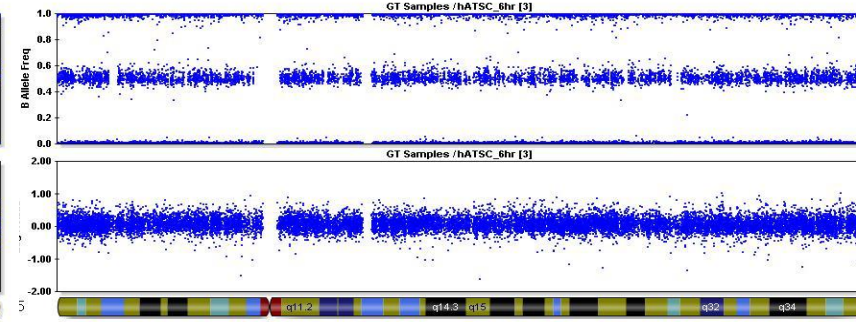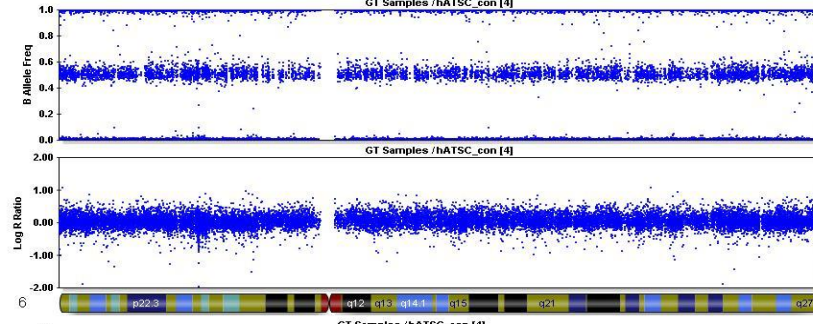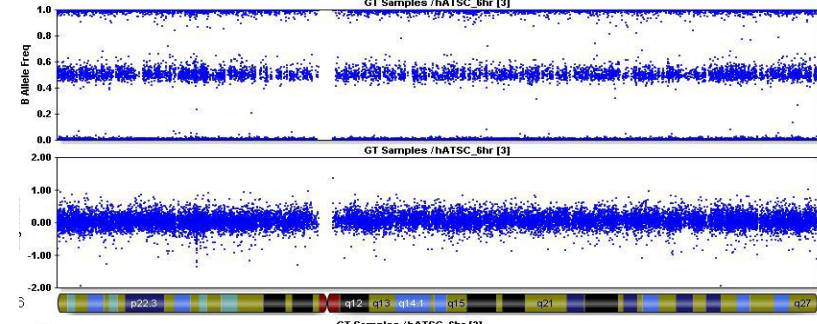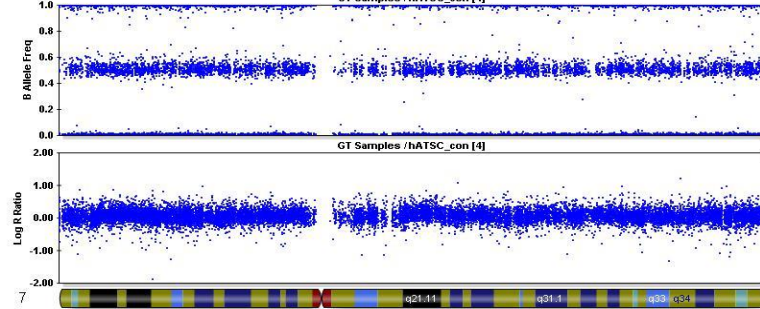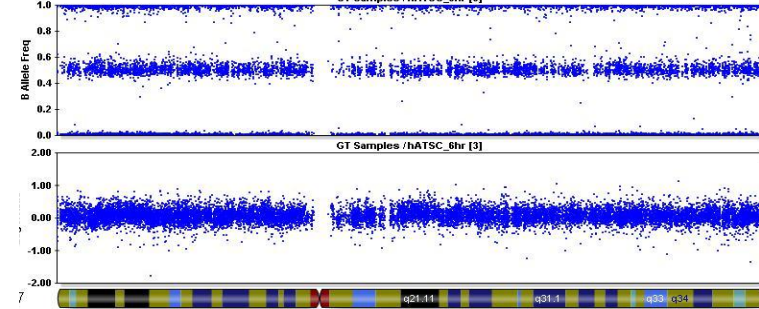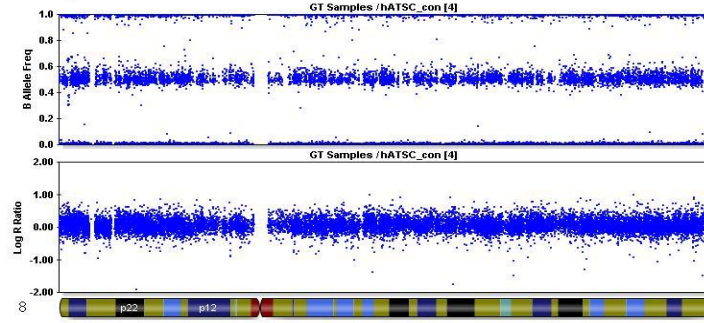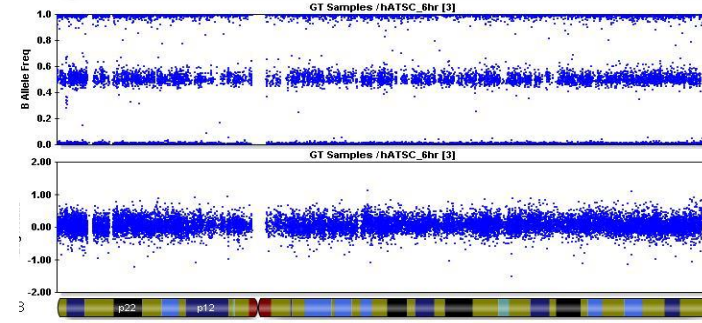

# Chromosome 9~12

## hATSC\_con

## De-hATSC

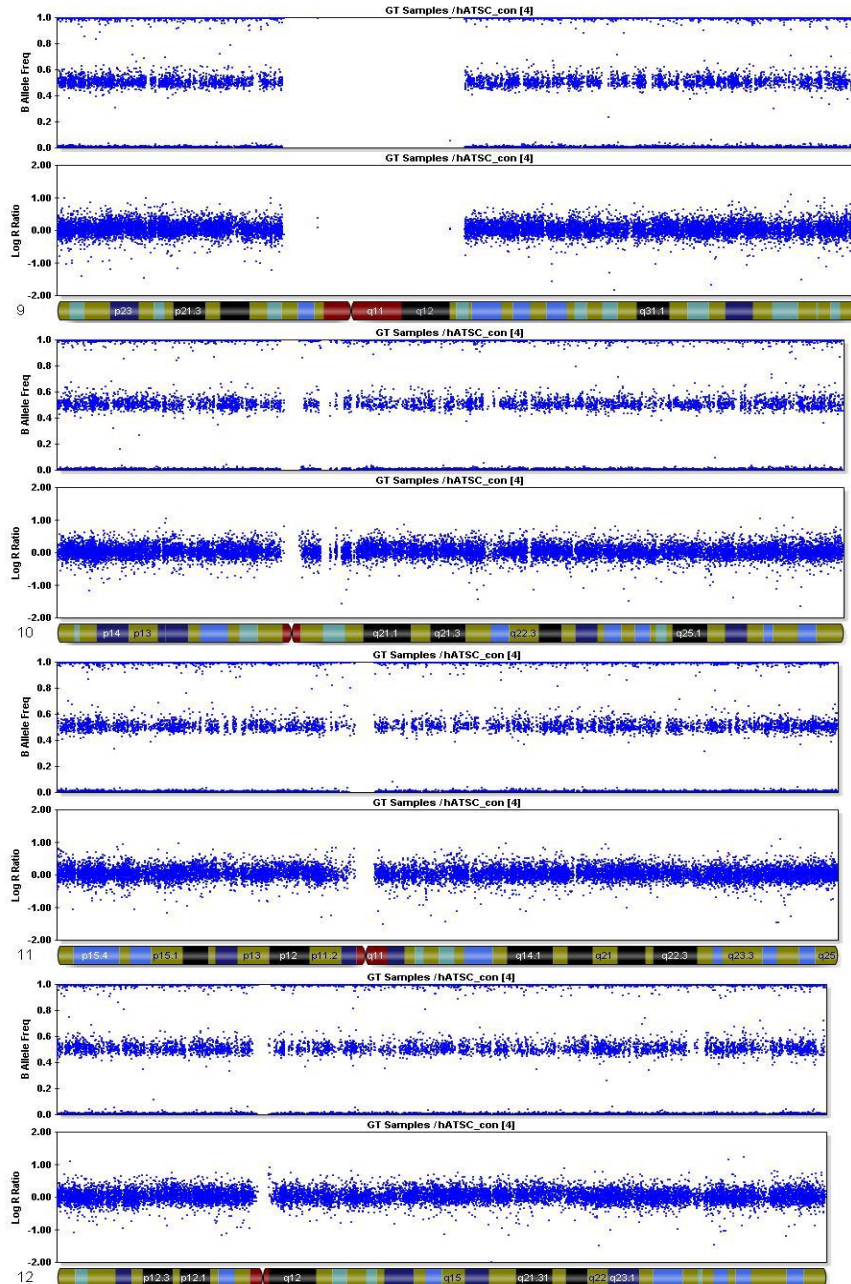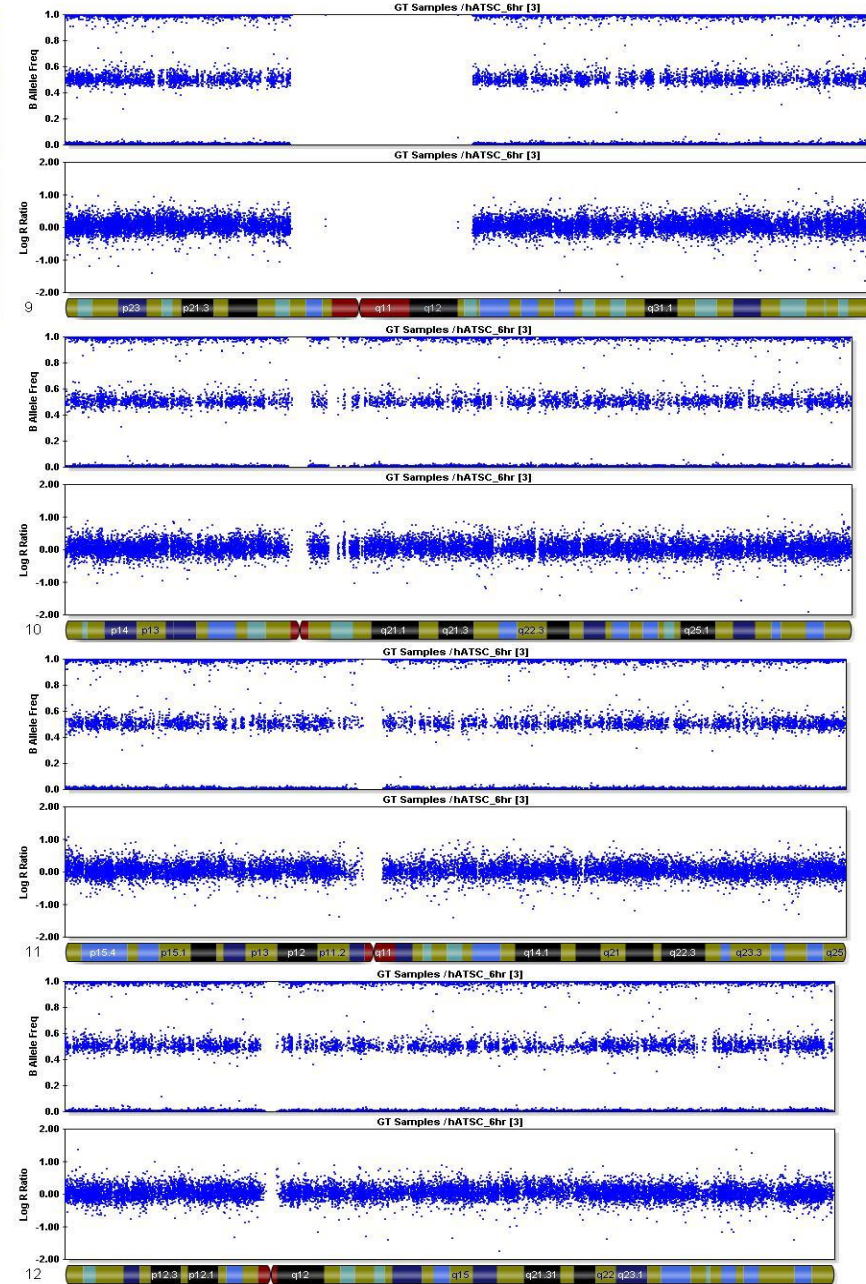

# Chromosome 13~16

## hATSC\_con

## De-hATSC\_

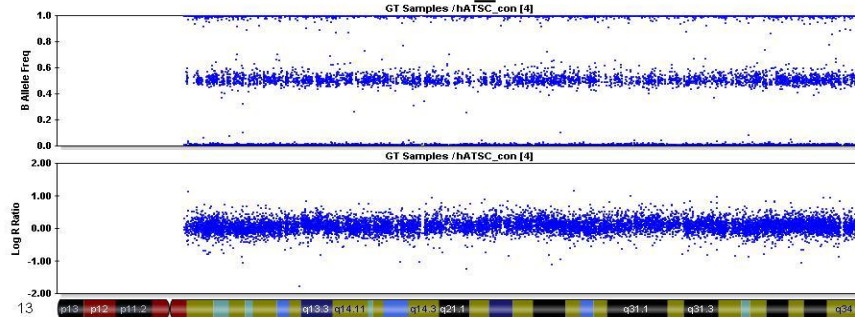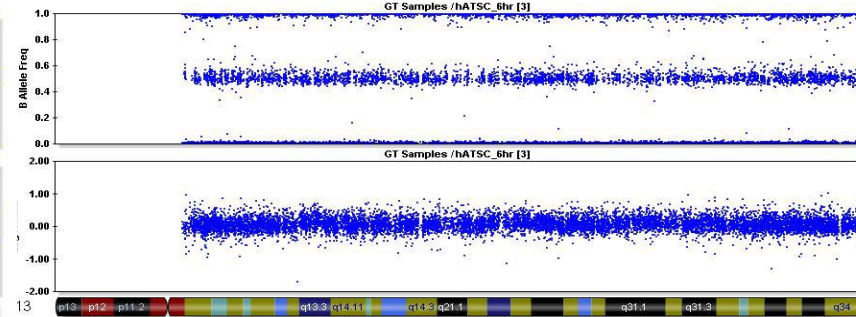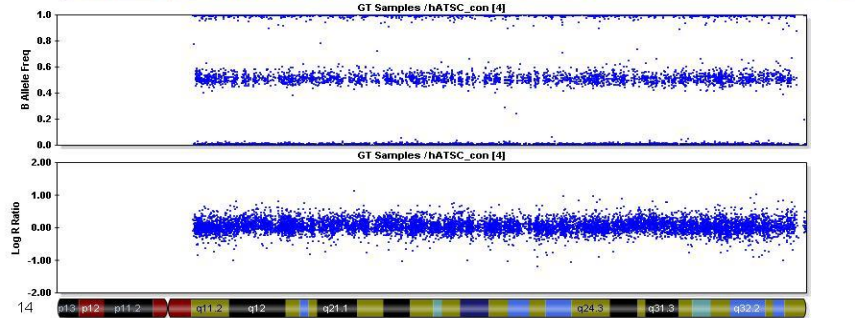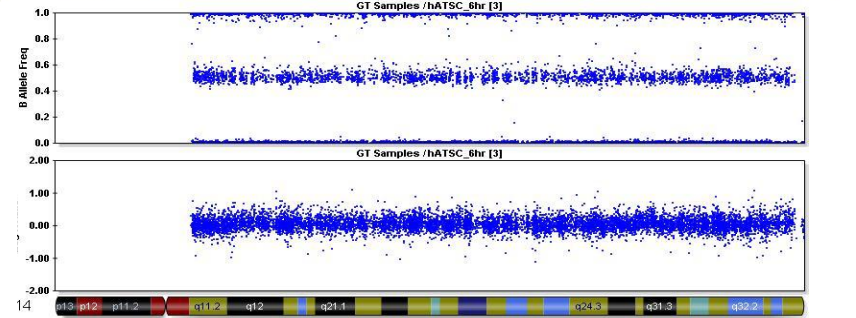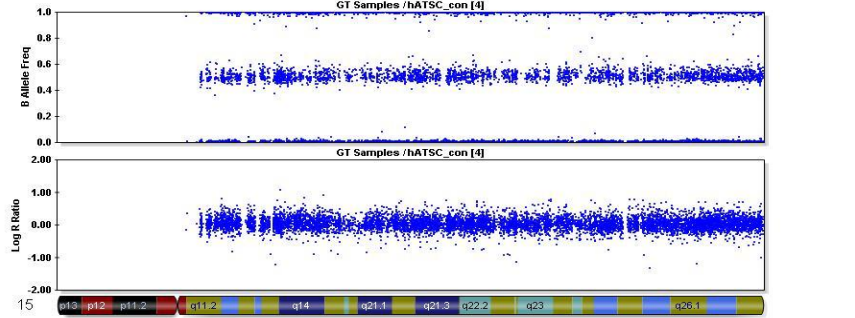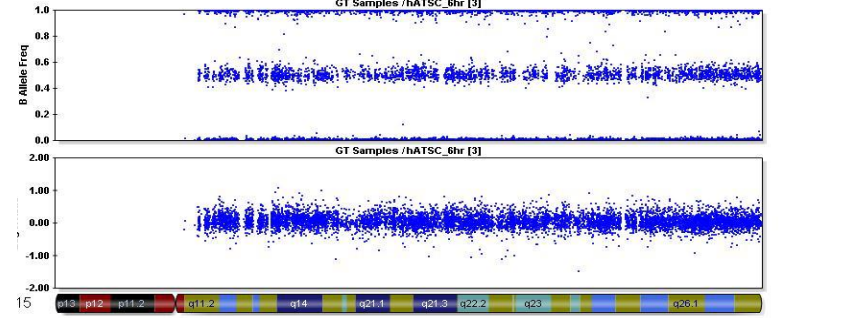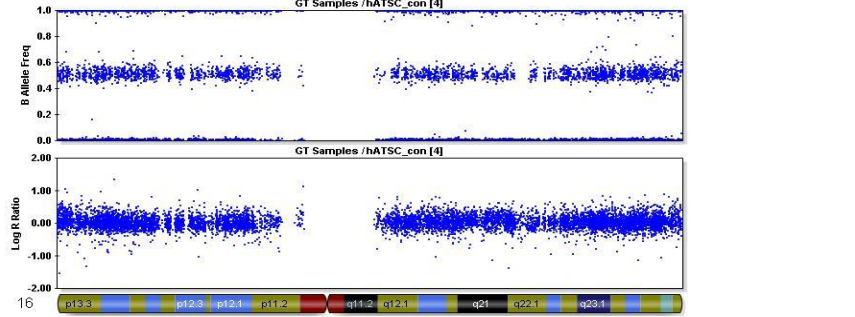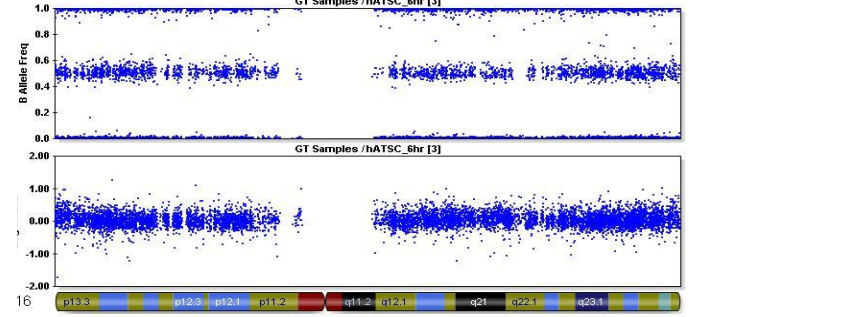

# Chromosome 17~20

## hATSC\_con

## De-hATSC\_

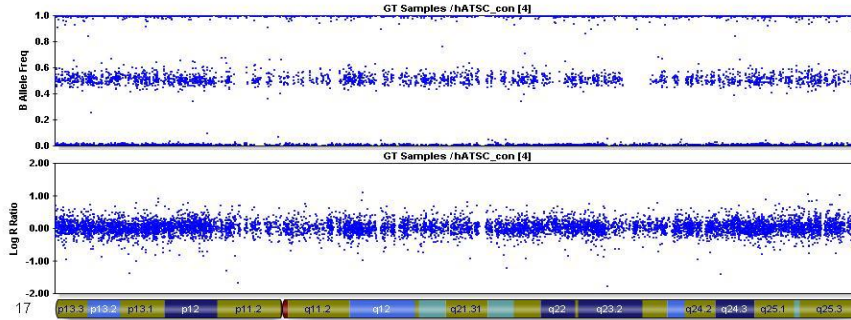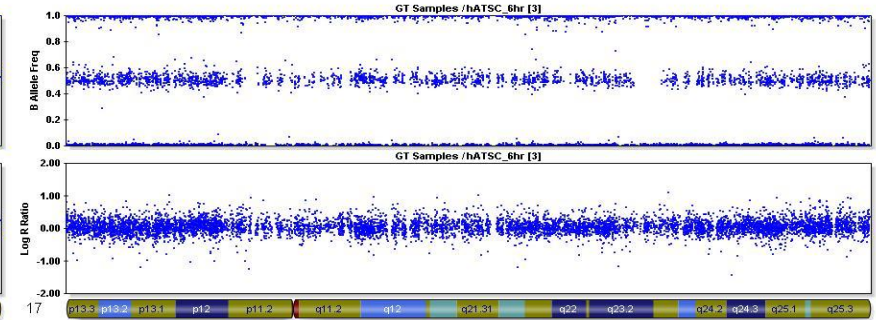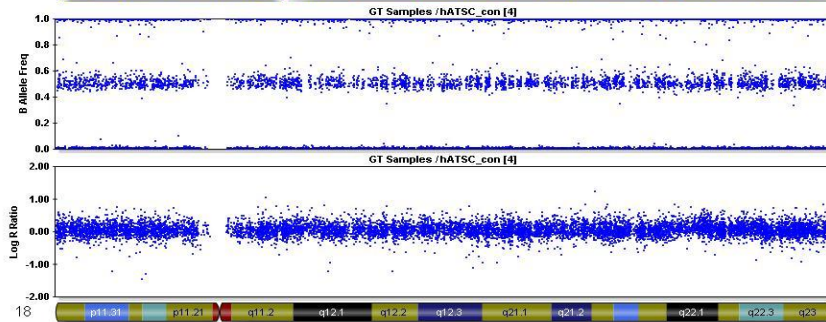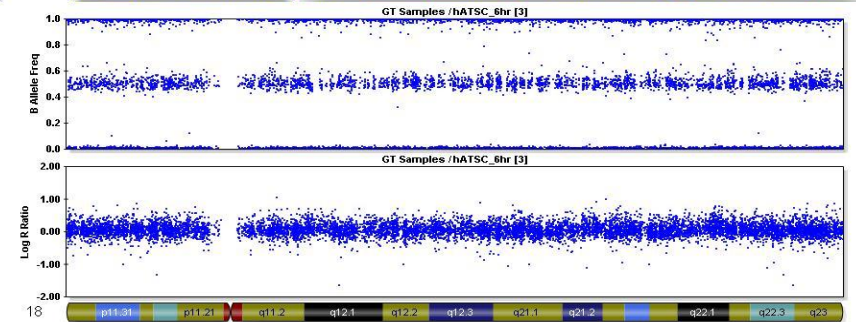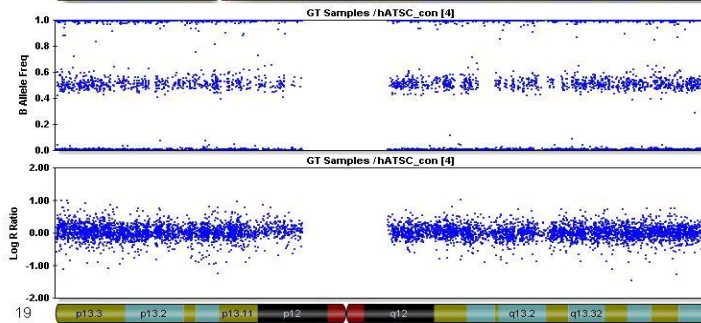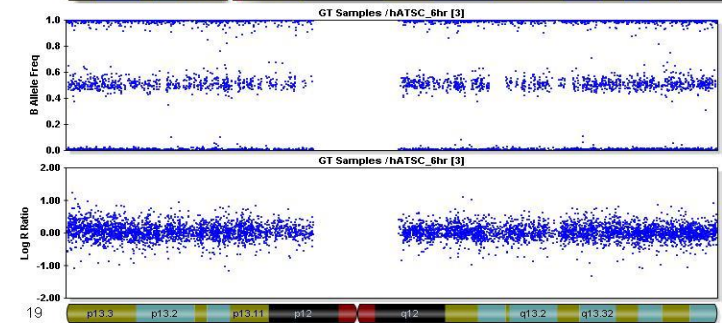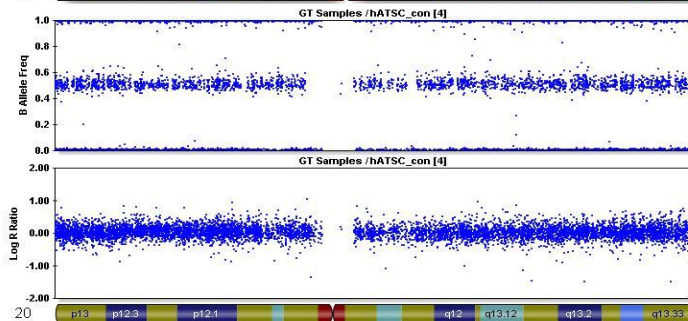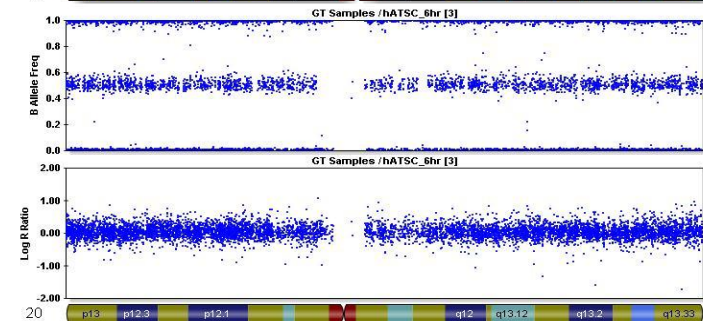

# Chromosome 21~X

## hATSC\_con

## De-hATSC

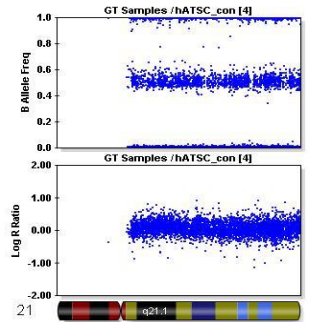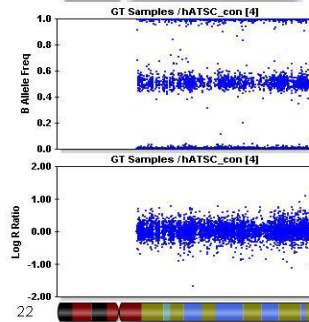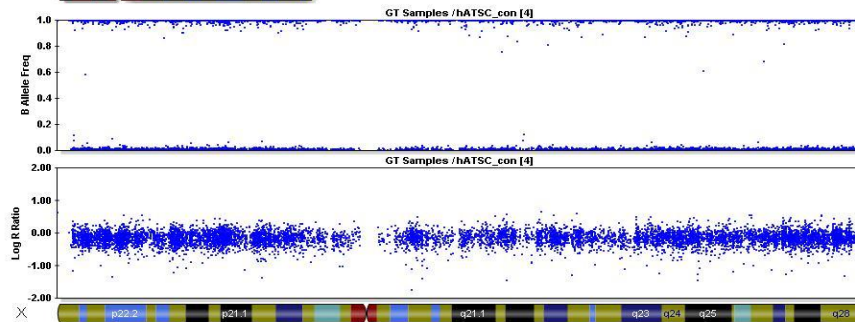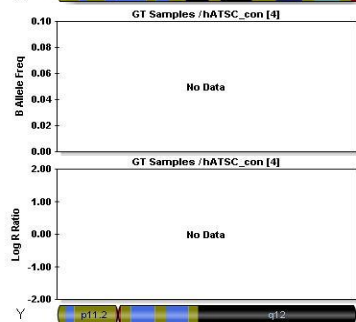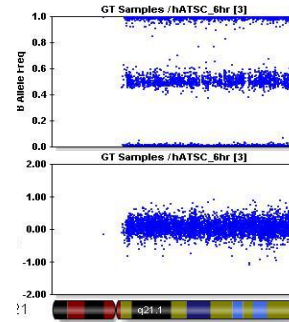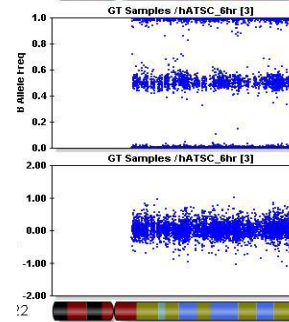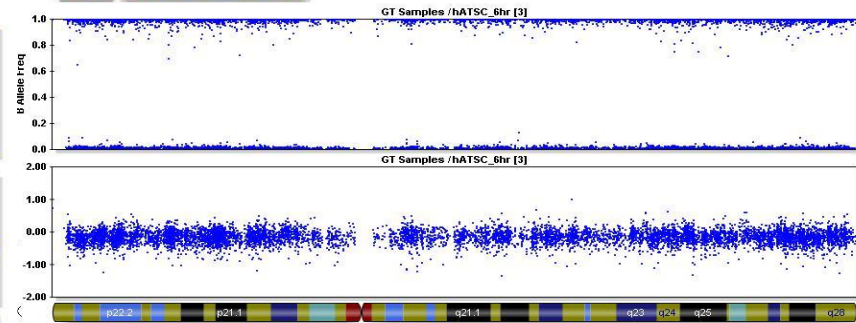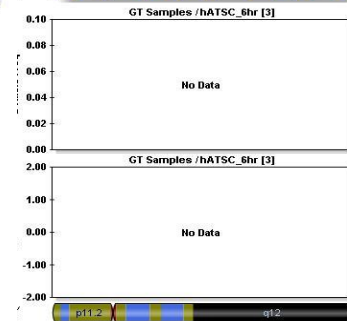

Supplement: pone.0009026.s005.pdf [file pone.0009026.s005.pdf]
